# Supplementary material for: Comprehensive Analysis of Gut Microbiota of a Healthy Population and Covariates Affecting Microbial Variation in Two Large Japanese Cohorts
Source: Research Square preprint supplement (doi:10.21203/rs.3.rs-89427/v1), 2020-10-14
Supplement: Supplementary file 1 [file d2aaac40680090654019a27a.xlsx]

## Sheet: Supple.table 3
	Supplementary table 3. Univariate analysis for overall microbiome community variation using the envfit function
	Factor
	NIBIOHN cohort (n=954)							MORINAGA cohort (n=642)
	factor_name	factor or numeric	factor category	r2	Pr(>r)	FDR		factor_name	factor or numeric	factor category	r2	Pr(>r)	FDR
	area	factor	Lifestyle	0.044241	<0.001	<0.01		sex	factor	Anthropometric	0.0242018	<0.001	<0.01
	smoke	factor	Lifestyle	0.0158979	<0.001	<0.01		excercise_swim	factor	Physical Activity	0.0139504	<0.01	0.073
	excercise	factor	Physical Activity	0.0255321	<0.001	<0.01		exbehavior_university	factor	Physical Activity	0.00681029	<0.05	0.564
	sex	factor	Anthropometric	0.0262142	<0.001	<0.01		exbehavior_highschool	factor	Physical Activity	0.00553699	0.0619938	0.587
	physical_activity	factor	Physical Activity	0.012378	<0.001	<0.01		excercise	factor	Physical Activity	0.00569306	0.0624938	0.587
	excercise_dance	factor	Physical Activity	0.0118919	<0.001	<0.01		weight_20	factor	Medical Histories	0.00507015	0.0823918	0.645
	job_class	factor	Lifestyle	0.0174825	<0.001	<0.01		job_class	factor	Lifestyle	0.0126872	0.127387	0.653
	excercise_walking	factor	Physical Activity	0.0101283	<0.001	<0.01		med_his_str_01	factor	Medical Histories	0.00741688	0.143286	0.653
	job	factor	Lifestyle	0.00965602	<0.001	<0.01		med_his_knee_01	factor	Medical Histories	0.0106043	0.149185	0.653
	excercise_stretch	factor	Physical Activity	0.00798688	<0.01	<0.01		gut_med_his_asthma_01	factor	Medical Histories	0.00975065	0.149485	0.653
	excercise_muscle	factor	Physical Activity	0.00713899	<0.01	<0.05		job	factor	Lifestyle	0.00356119	0.169583	0.653
	walking_speed	factor	Physical Activity	0.00638407	<0.01	<0.05		gut_med_his_rhinitis_01	factor	Medical Histories	0.00641763	0.173583	0.653
	med_his_kid_01	factor	Medical Histories	0.01173	<0.01	<0.05		excercise_ball	factor	Physical Activity	0.00345037	0.180482	0.653
	gut_med_his_atopy_01	factor	Medical Histories	0.00937139	<0.05	<0.05		excercise_jog	factor	Physical Activity	0.00267478	0.258074	0.827
	excercise_ball	factor	Physical Activity	0.00448784	<0.05	0.057		gut_med_his_thyroid_01	factor	Medical Histories	0.00980387	0.274673	0.827
	exbehavior_primary	factor	Physical Activity	0.00399586	<0.05	0.082		exbehavior_ex1	factor	Physical Activity	0.00250601	0.281472	0.827
	med_his_ht_01	factor	Medical Histories	0.00750136	<0.05	0.105		med_his_back_01	factor	Medical Histories	0.00439996	0.315268	0.846
	weight_20	factor	Medical Histories	0.00358993	<0.05	0.105		med_his_hd_01	factor	Medical Histories	0.00661237	0.342566	0.846
	excercise_jog	factor	Physical Activity	0.00285031	0.0837916	0.207		excercise_muscle	factor	Physical Activity	0.00196821	0.378162	0.846
	gut_med_his_ra_01	factor	Medical Histories	0.00621807	0.10259	0.238		med_his_bone_01	factor	Medical Histories	0.00405284	0.387761	0.846
	med_his_can_01	factor	Medical Histories	0.00413884	0.109089	0.238		smoke	factor	Lifestyle	0.00395988	0.40436	0.846
	med_his_bone_01	factor	Medical Histories	0.00574212	0.116388	0.238		exbehavior_junior	factor	Physical Activity	0.00180253	0.405859	0.846
	med_his_mood_01	factor	Medical Histories	0.00572145	0.116388	0.238		gut_med_his_pollen_allergy_01	factor	Medical Histories	0.00607322	0.413959	0.846
	med_his_knee_01	factor	Medical Histories	0.00515929	0.152585	0.287		physical_activity	factor	Physical Activity	0.0015492	0.464854	0.91
	gut_med_his_hives_01	factor	Medical Histories	0.00509831	0.157084	0.287		excercise_walking	factor	Physical Activity	0.00139979	0.50155	0.943
	gut_med_his_drymouth_01	factor	Medical Histories	0.00356551	0.159284	0.287		med_his_mood_01	factor	Medical Histories	0.000931217	0.590241	1
	gut_stool_time	factor	Bowel Habit	0.00919145	0.164784	0.287		walking_speed	factor	Physical Activity	0.000833724	0.656334	1
	excercise_swim	factor	Physical Activity	0.00175606	0.19738	0.331		med_his_ht_01	factor	Medical Histories	0.00239204	0.656334	1
	gut_med_his_pollen_allergy_01	factor	Medical Histories	0.00447327	0.220278	0.357		gut_med_his_ra_01	factor	Medical Histories	0.000775183	0.666833	1
	med_his_hd_01	factor	Medical Histories	0.00400239	0.281972	0.442		med_his_can_01	factor	Medical Histories	0.00368685	0.70483	1
	med_his_dm_01	factor	Medical Histories	0.00333194	0.380262	0.563		gut_med_his_atopy_01	factor	Medical Histories	0.00346965	0.708429	1
	sleep_well	factor	Lifestyle	0.000992625	0.386461	0.563		gut_stool_time	factor	Bowel Habit	0.00882639	0.709729	1
	exbehavior_ex1	factor	Physical Activity	0.000962366	0.394961	0.563		excercise_stretch	factor	Physical Activity	0.000658305	0.722028	1
	med_his_lipid_01	factor	Medical Histories	0.00316938	0.429857	0.594		area	factor	Lifestyle	0.0149064	0.783022	1
	med_his_ihd_01	factor	Medical Histories	0.00300062	0.450155	0.604		exbehavior_primary	factor	Physical Activity	0.000474861	0.783922	1
	q_gut_med_his_ibs_01	factor	Medical Histories	0.000627179	0.568643	0.742		excercise_dance	factor	Physical Activity	0.000440214	0.806119	1
	exbehavior_junior	factor	Physical Activity	0.000511107	0.615138	0.781		med_his_lipid_01	factor	Medical Histories	0.00182664	0.929007	1
	gut_med_his_cu_01	factor	Medical Histories	0.000524209	0.640136	0.792		med_his_dm_01	factor	Medical Histories	0.000593909	0.960504	1
	med_his_str_01	factor	Medical Histories	0.00209732	0.662834	0.799		sleep_well	factor	Lifestyle	9.38605e-06	0.9954	1
	excercise_combat	factor	Physical Activity	0.000432491	0.680832	0.8		excercise_combat	factor	Physical Activity	0	1	1
	med_his_back_01	factor	Medical Histories	0.00194573	0.717328	0.81		med_his_ihd_01	factor	Medical Histories	0	1	1
	gut_med_his_rhinitis_01	factor	Medical Histories	0.0019505	0.724128	0.81		med_his_kid_01	factor	Medical Histories	0	1	1
	exbehavior_highschool	factor	Physical Activity	0.000165673	0.846215	0.925		q_gut_med_his_ibs_01	factor	Medical Histories	0	1	1
	gut_med_his_thyroid_01	factor	Medical Histories	0.00139518	0.866613	0.926		gut_med_his_cu_01	factor	Medical Histories	0	1	1
	exbehavior_university	factor	Physical Activity	9.99437e-05	0.908709	0.949		gut_med_his_cd_01	factor	Medical Histories	0	1	1
	gut_med_his_asthma_01	factor	Medical Histories	0.000673806	0.974103	0.995		gut_med_his_hives_01	factor	Medical Histories	0	1	1
	gut_med_his_cd_01	factor	Medical Histories	0	1	1		gut_med_his_drymouth_01	factor	Medical Histories	0	1	1
	Vector
	NIBIOHN cohort (n=954)							MORINAGA cohort (n=642)
	factor_name	factor or numeric	factor category	r2	Pr(>r)	FDR		factor_name	factor or numeric	factor category	r2	Pr(>r)	FDR
	gut_habit_stool_freq	category	Bowel Habit	0.0211283	<0.001	<0.001		gut_habit_stool_freq	category	Bowel Habit	0.0608579	<0.001	<0.01
	eat_drinkingparty_often	category	Lifestyle	0.0218677	<0.001	<0.001		eat_drinkingparty_often	category	Lifestyle	0.0568655	<0.001	<0.01
	eat_drink_beer	category	Lifestyle	0.0314812	<0.001	<0.001		eat_drink_beer	category	Lifestyle	0.0402099	<0.001	<0.01
	gut_stool_shape	category	Bowel Habit	0.0511144	<0.001	<0.001		gut_stool_shape	category	Bowel Habit	0.0963945	<0.001	<0.01
	gut_stool_smell	category	Bowel Habit	0.0511144	<0.001	<0.001		gut_stool_smell	category	Bowel Habit	0.0963945	<0.001	<0.01
	gut_stool_feel	category	Bowel Habit	0.0511144	<0.001	<0.001		gut_stool_feel	category	Bowel Habit	0.0963945	<0.001	<0.01
	job_time	numeric	Lifestyle	0.0351769	<0.001	<0.001		weight	numeric	Anthropometric	0.0495876	<0.001	<0.01
	age	category	Anthropometric	0.0469708	<0.001	<0.001		Beer	numeric	Dietary Habit	0.0528828	<0.001	<0.01
	height	numeric	Anthropometric	0.0562445	<0.001	<0.001		gut_stool_color	category	Bowel Habit	0.0320078	<0.001	<0.01
	weight	numeric	Anthropometric	0.0429845	<0.001	<0.001		height	numeric	Anthropometric	0.0321239	<0.001	<0.01
	Normal fat dairy products	numeric	Dietary Habit	0.0313742	<0.001	<0.001		gut_habit_stool_poot	category	Bowel Habit	0.027338	<0.01	<0.05
	Small fish	numeric	Dietary Habit	0.0254409	<0.001	<0.001		gut_stool_amount	category	Bowel Habit	0.0259296	<0.01	<0.05
	Tofu	numeric	Dietary Habit	0.0254192	<0.001	<0.001		bmi	numeric	Anthropometric	0.0242492	<0.01	<0.05
	Green and yellow vegetables	numeric	Dietary Habit	0.027163	<0.001	<0.001		eat_snack_often	category	Lifestyle	0.0217345	<0.01	<0.05
	Japanese cake	numeric	Dietary Habit	0.0256513	<0.001	<0.001		Sake	numeric	Dietary Habit	0.0243413	<0.01	<0.05
	Citrus fruits	numeric	Dietary Habit	0.0258751	<0.001	<0.001		Pickles (other vegetables)	numeric	Dietary Habit	0.0215873	<0.01	<0.05
	Persimmon and strawberry	numeric	Dietary Habit	0.0205642	<0.001	<0.001		Miso soup	numeric	Dietary Habit	0.0212573	<0.01	<0.05
	Other fruits	numeric	Dietary Habit	0.0300551	<0.001	<0.001		Bread	numeric	Dietary Habit	0.0204729	<0.01	<0.05
	Chinese noodles	numeric	Dietary Habit	0.0293536	<0.001	<0.001		Shochu	numeric	Dietary Habit	0.0202258	<0.01	<0.05
	Boiled rice	numeric	Dietary Habit	0.0234194	<0.001	<0.001		job_time	numeric	Lifestyle	0.0187273	<0.01	<0.05
	Beer	numeric	Dietary Habit	0.0259053	<0.001	<0.001		Cake	numeric	Dietary Habit	0.0181241	<0.05	<0.05
	Shochu	numeric	Dietary Habit	0.0190679	<0.001	<0.001		age	category	Anthropometric	0.0179343	<0.05	<0.05
	Soup of noodles	numeric	Dietary Habit	0.0323558	<0.001	<0.001		Squid, octopus, shrimp or shellfish	numeric	Dietary Habit	0.0178028	<0.05	0.054
	Cooking salt	numeric	Dietary Habit	0.024999	<0.001	<0.001		Whiskey	numeric	Dietary Habit	0.0177596	<0.05	0.054
	Udon	numeric	Dietary Habit	0.0193877	<0.001	<0.01		Japanese cake	numeric	Dietary Habit	0.0165367	<0.05	0.057
	Potato	numeric	Dietary Habit	0.0146739	<0.01	<0.01		Raw vegetables	numeric	Dietary Habit	0.0161705	<0.05	0.06
	Seaweed	numeric	Dietary Habit	0.0131123	<0.01	<0.01		Fatty fish	numeric	Dietary Habit	0.014725	<0.05	0.085
	gut_enjoy	category	Lifestyle	0.0117924	<0.01	<0.05		Wine	numeric	Dietary Habit	0.0143075	<0.05	0.09
	Cooking sugar	numeric	Dietary Habit	0.0118375	<0.01	<0.05		Crackers	numeric	Dietary Habit	0.012324	<0.05	0.145
	bmi	numeric	Anthropometric	0.0114049	<0.01	<0.05		Coffee	numeric	Dietary Habit	0.0112639	0.0612939	0.175
	gut_well_being	category	Lifestyle	0.01203	<0.01	<0.05		Persimmon and strawberry	numeric	Dietary Habit	0.0112141	0.0623938	0.175
	gut_stress	category	Lifestyle	0.0108809	<0.01	<0.05		Fruit and vegetable juice	numeric	Dietary Habit	0.0102567	0.0738926	0.201
	Liver meat	numeric	Dietary Habit	0.0106543	<0.01	<0.05		Boiled rice	numeric	Dietary Habit	0.0103333	0.0774923	0.204
	Cake	numeric	Dietary Habit	0.0106958	<0.01	<0.05		Egg	numeric	Dietary Habit	0.0100975	0.0816918	0.209
	Coffee	numeric	Dietary Habit	0.0106242	<0.01	<0.05		gut_f_oligo_amount	category	Lifestyle	0.00964628	0.0869913	0.216
	Carrot and squash	numeric	Dietary Habit	0.0110662	<0.01	<0.05		Lean fish	numeric	Dietary Habit	0.00891793	0.109689	0.259
	Whiskey	numeric	Dietary Habit	0.0104871	<0.01	<0.05		Chicken	numeric	Dietary Habit	0.00893299	0.110189	0.259
	gut_smile	category	Lifestyle	0.0100564	<0.01	<0.05		sleep_weekday_duration	category	Lifestyle	0.00868495	0.114689	0.263
	Fatty fish	numeric	Dietary Habit	0.010171	<0.05	<0.05		Cabbage	numeric	Dietary Habit	0.00843646	0.126087	0.281
	eat_fastfood	category	Lifestyle	0.00993916	<0.05	<0.05		sleep_weekday_nap	category	Lifestyle	0.00803066	0.136986	0.298
	Tomato	numeric	Dietary Habit	0.00912957	<0.05	<0.05		Sugar	numeric	Dietary Habit	0.00754977	0.153285	0.325
	gut_f_oligo_amount	category	Lifestyle	0.00857962	<0.05	<0.05		Liver meat	numeric	Dietary Habit	0.0068935	0.179482	0.371
	Root vegetables	numeric	Dietary Habit	0.00850799	<0.05	<0.05		Mushroom	numeric	Dietary Habit	0.00683258	0.183182	0.371
	Green tea	numeric	Dietary Habit	0.00822296	<0.05	<0.05		Tofu	numeric	Dietary Habit	0.00635955	0.207579	0.41
	sleep_weekend_duration	category	Lifestyle	0.00793621	<0.05	0.052		Other fruits	numeric	Dietary Habit	0.00614557	0.220978	0.427
	gut_f_oligo_freq	category	Lifestyle	0.00765395	<0.05	0.052		Seaweed	numeric	Dietary Habit	0.00580502	0.234877	0.437
	Soy sauce	numeric	Dietary Habit	0.00796556	<0.05	0.052		Pasta	numeric	Dietary Habit	0.0056538	0.240676	0.437
	Egg	numeric	Dietary Habit	0.00715582	<0.05	0.064		Tuna	numeric	Dietary Habit	0.00570951	0.241276	0.437
	Japanese white radish and turnip	numeric	Dietary Habit	0.00721194	<0.05	0.067		sleep_weekend_nap	category	Lifestyle	0.00521532	0.275372	0.486
	Soba	numeric	Dietary Habit	0.00694294	<0.05	0.081		Potato	numeric	Dietary Habit	0.00509349	0.279272	0.486
	Pork and beef	numeric	Dietary Habit	0.0061334	0.060094	0.103		gut_smile	category	Lifestyle	0.00511106	0.288071	0.49
	eat_snack_often	category	Lifestyle	0.00584862	0.0626937	0.104		Natto	numeric	Dietary Habit	0.0048995	0.29557	0.49
	Natto	numeric	Dietary Habit	0.00596258	0.0648935	0.104		Pickles (green and yellow vegetables)	numeric	Dietary Habit	0.00492262	0.29827	0.49
	Cabbage	numeric	Dietary Habit	0.00586443	0.0654935	0.104		Ice cream	numeric	Dietary Habit	0.00438605	0.341666	0.541
	Mushroom	numeric	Dietary Habit	0.00579434	0.0656934	0.104		gut_f_oligo_freq	category	Lifestyle	0.00421452	0.345265	0.541
	Raw vegetables	numeric	Dietary Habit	0.0056827	0.0729927	0.113		Cooking salt	numeric	Dietary Habit	0.00432137	0.348165	0.541
	Pickles (other vegetables)	numeric	Dietary Habit	0.00533737	0.089791	0.137		Soy sauce	numeric	Dietary Habit	0.00388744	0.377862	0.558
	Sugar	numeric	Dietary Habit	0.00523834	0.0917908	0.138		eat_fast	category	Lifestyle	0.00386642	0.382962	0.558
	gut_stool_color	category	Bowel Habit	0.00515657	0.0947905	0.14		Udon	numeric	Dietary Habit	0.00375907	0.387361	0.558
	Dried fish	numeric	Dietary Habit	0.00509842	0.0972903	0.141		Green and yellow vegetables	numeric	Dietary Habit	0.00377597	0.393561	0.558
	Sake	numeric	Dietary Habit	0.00487446	0.09969	0.142		Chinese noodles	numeric	Dietary Habit	0.00379833	0.39716	0.558
	sleep_weekend_nap	category	Lifestyle	0.00480896	0.108089	0.15		Normal fat dairy products	numeric	Dietary Habit	0.00367859	0.39756	0.558
	gut_fatigue	category	Lifestyle	0.00474382	0.108789	0.15		Small fish	numeric	Dietary Habit	0.00344965	0.422958	0.584
	Low fat dairy products	numeric	Dietary Habit	0.00480215	0.113989	0.155		gut_enjoy	category	Lifestyle	0.00335936	0.435356	0.592
	Ice cream	numeric	Dietary Habit	0.00468372	0.115588	0.155		Dried fish	numeric	Dietary Habit	0.00321832	0.448855	0.601
	Pickles (green and yellow vegetables)	numeric	Dietary Habit	0.00400412	0.159184	0.21		Citrus fruits	numeric	Dietary Habit	0.0031276	0.462054	0.609
	Coke	numeric	Dietary Habit	0.00390731	0.167383	0.217		Black tea and oolong tea	numeric	Dietary Habit	0.00290919	0.483452	0.628
	Squid, octopus, shrimp or shellfish	numeric	Dietary Habit	0.00380589	0.177982	0.228		Soup of noodles	numeric	Dietary Habit	0.00280635	0.49765	0.635
	Tuna	numeric	Dietary Habit	0.00360207	0.190281	0.238		Soba	numeric	Dietary Habit	0.00283191	0.50425	0.635
	Fruit and vegetable juice	numeric	Dietary Habit	0.00353809	0.191981	0.238		Tomato	numeric	Dietary Habit	0.00268128	0.510749	0.635
	Pasta	numeric	Dietary Habit	0.00359391	0.193981	0.238		Ham	numeric	Dietary Habit	0.00249363	0.543546	0.666
	Wine	numeric	Dietary Habit	0.00323043	0.227677	0.275		gut_fatigue	category	Lifestyle	0.00201004	0.606039	0.732
	Crackers	numeric	Dietary Habit	0.00306262	0.242176	0.289		Pork and beef	numeric	Dietary Habit	0.00195617	0.617238	0.736
	sleep_weekday_duration	category	Lifestyle	0.00209399	0.388061	0.453		Root vegetables	numeric	Dietary Habit	0.00184289	0.643036	0.75
	Lean fish	numeric	Dietary Habit	0.00207781	0.390361	0.453		gut_well_being	category	Lifestyle	0.00178962	0.646835	0.75
	Miso soup	numeric	Dietary Habit	0.00202558	0.39786	0.455		sleep_weekend_duration	category	Lifestyle	0.00163682	0.658434	0.754
	Bread	numeric	Dietary Habit	0.0019737	0.40286	0.455		Coke	numeric	Dietary Habit	0.00144092	0.69883	0.79
	gut_habit_stool_poot	category	Bowel Habit	0.00151706	0.50315	0.558		Green tea	numeric	Dietary Habit	0.00129095	0.723628	0.807
	eat_fast	category	Lifestyle	0.00150331	0.506249	0.558		Cooking oil	numeric	Dietary Habit	0.00122001	0.733127	0.807
	sleep_weekday_nap	category	Lifestyle	0.00124194	0.560244	0.609		Cooking sugar	numeric	Dietary Habit	0.000751755	0.836116	0.895
	Chicken	numeric	Dietary Habit	0.00121236	0.573543	0.616		eat_fastfood	category	Lifestyle	0.000724692	0.837916	0.895
	Black tea and oolong tea	numeric	Dietary Habit	0.00113553	0.592741	0.629		Mayonnaise	numeric	Dietary Habit	0.000700104	0.843116	0.895
	Ham	numeric	Dietary Habit	0.0010103	0.627537	0.658		Carrot and squash	numeric	Dietary Habit	0.000545043	0.867613	0.901
	gut_stool_amount	category	Bowel Habit	0.000581966	0.764524	0.792		gut_stress	category	Lifestyle	0.000577605	0.870613	0.901
	Mayonnaise	numeric	Dietary Habit	0.000319321	0.865013	0.882		Low fat dairy products	numeric	Dietary Habit	0.000491908	0.880712	0.901
	eat_mealtime_irregular	category	Lifestyle	0.000296623	0.871913	0.882		eat_mealtime_irregular	category	Lifestyle	0.000426838	0.90471	0.915
	Cooking oil	numeric	Dietary Habit	0.000265238	0.886211	0.886		Japanese white radish and turnip	numeric	Dietary Habit	0.000265096	0.936806	0.937
